# Supplementary material for: Potato Juice, a Starch Industry Waste, as a Cost-Effective Medium for the Biosynthesis of Bacterial Cellulose
Source: MDPI journal article supplement (doi:10.3390/ijms221910807), 2021-10-06
Supplement: s1 [file s1]

# Supplementary material

## Potato juice, a starch industry waste, as a cost-effective medium for the biosynthesis of bacterial cellulose

Daria Ciecholewska-Juśko <sup>1</sup>, Michał Broda <sup>1,2</sup>, Anna Żywicka <sup>1</sup>, Daniel Styburski <sup>3</sup>, Peter Sobolewski <sup>4</sup>, Krzysztof Gorący <sup>4</sup>, Paweł Migdał <sup>5</sup>, Adam Junka <sup>6</sup>, and Karol Fijałkowski <sup>1,\*</sup>

<sup>1</sup> Department of Microbiology and Biotechnology, Faculty of Biotechnology and Animal Husbandry,  
West Pomeranian University of Technology, Szczecin, Piastów 45, 70-311 Szczecin,  
Poland; daria.ciecholewska@zut.edu.pl (D.C.-J.); michal.broda@zut.edu.pl (M.B.);  
anna.zywicka@zut.edu.pl (A.Ż.)

<sup>2</sup> Pomeranian-Masurian Potato Breeding Company, 76-024 Strzekęcino, Poland

<sup>3</sup> Laboratory of Chromatography and Mass Spectroscopy, Faculty of Biotechnology and Animal Husbandry, West Pomeranian University of Technology, Szczecin, Klemensa Janickiego 29, 71-270 Szczecin, Poland; daniel.styburski@zut.edu.pl (D.S.)

<sup>4</sup> Department of Polymer and Biomaterials Science, Faculty of Chemical Technology and Engineering,  
West Pomeranian University of Technology, Szczecin, Piastów 45, 70-311 Szczecin,  
Poland;  
psobolewski@zut.edu.pl (P.S.); krzysztof.goracy@zut.edu.pl (K.G.)

<sup>5</sup> Department of Environment, Hygiene and Animal Welfare, Faculty of Biology and Animal Science, Wrocław University of Environmental and Life Sciences,  
Chelmońskiego 38C, 51-630 Wrocław, Poland;  
pawel.migdal@upwr.edu.pl (P.M.)

<sup>6</sup> Department of Pharmaceutical Microbiology and Parasitology, Faculty of Pharmacy,  
Medical University of Wrocław, Borowska 211a, 50-534 Wrocław, Poland;  
adam.junka@umed.wroc.pl (A.J.)

\* Correspondence: karol.fijalkowski@zut.edu.pl; Tel.: +48 91-449-6714

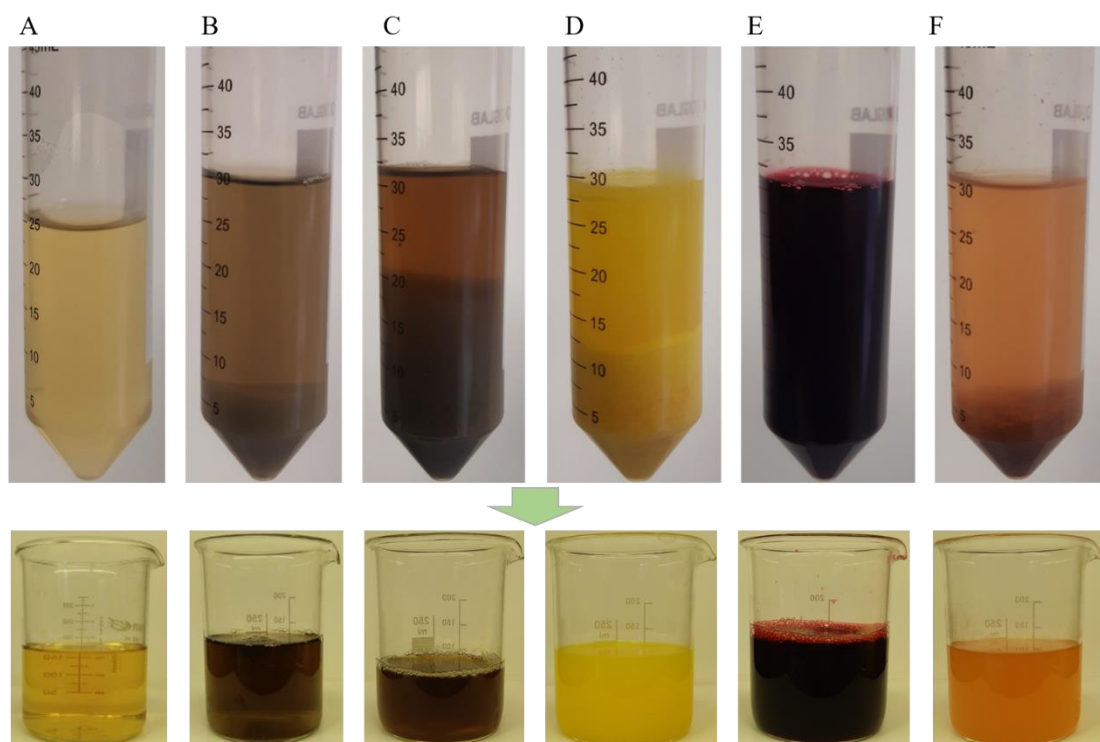

**Figure S1.** HS and natural ingredients-based media before (in 50 mL plastic tubes) and after decantation (in glass beakers); (A) HS; (B) potato juice; (C) potato peels; (D) orange peels; (E) beetroot; (F) apple.

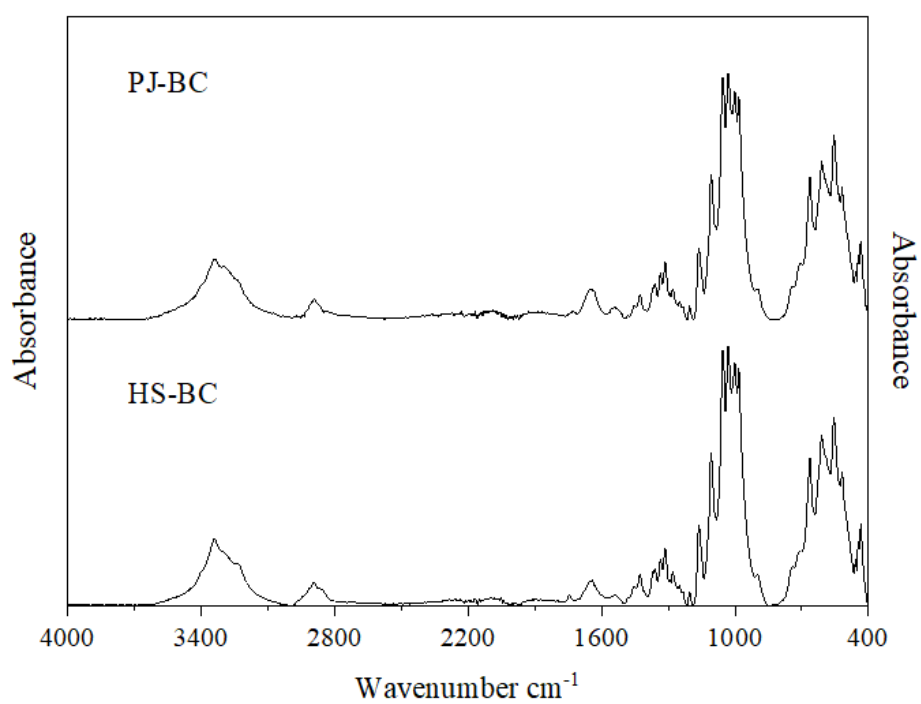

**Figure S2.** ATR-FTIR spectra of HS-BC and PJ-BC obtained from *K. xylinus* ATCC 53524 cultures.

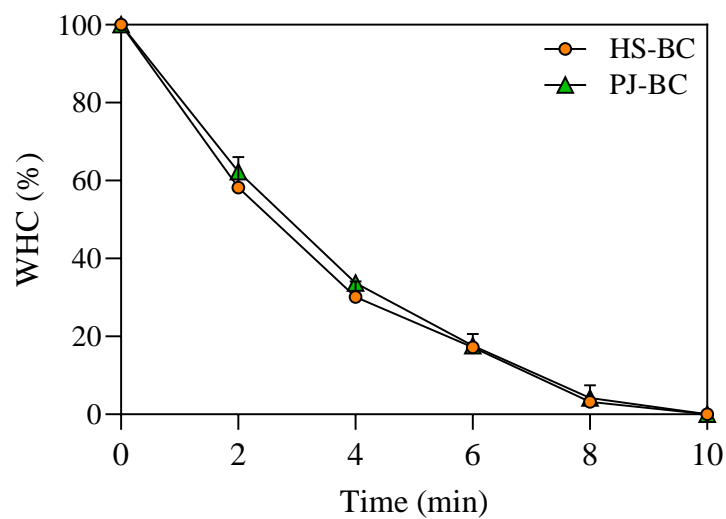

**Figure S3.** Water holding capacity (%) of HS-BC and PJ-BC obtained from *K. xylinus* ATCC 53524 during drying process at 60°C. Data are presented as a mean  $\pm$  standard error of the mean (SEM).

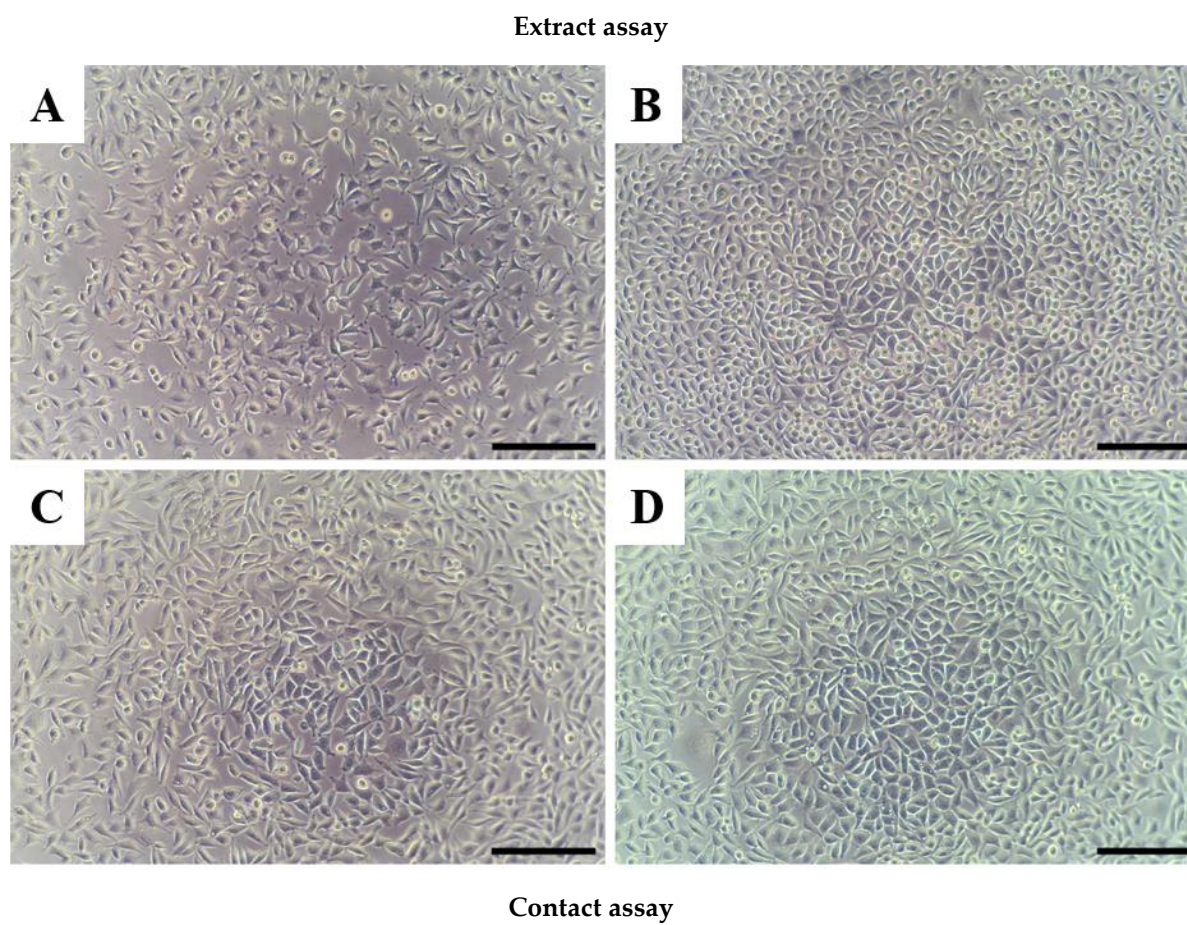

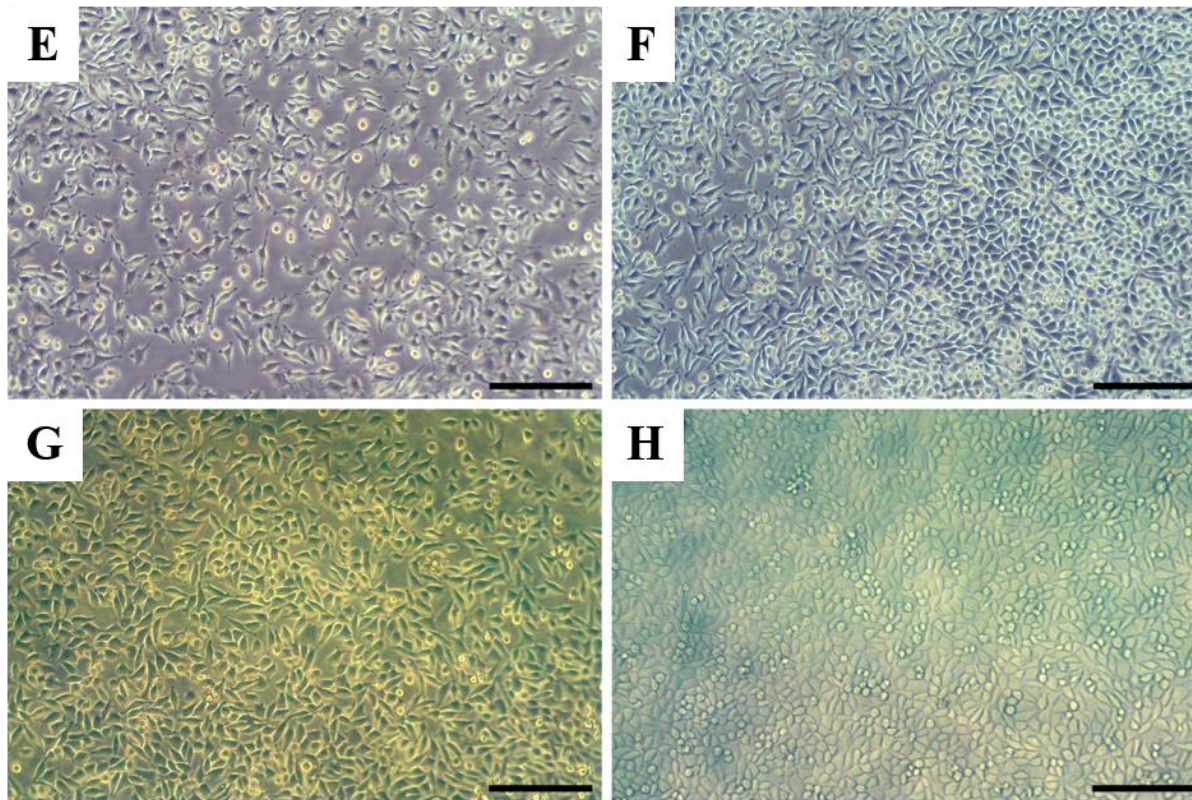

**Figure S4.** Representative micrographs of L929 cells. (A) 24 h after seeding (10000 cells per well); (B) After 24 h of incubation with sham extract; (C),(D) After 24 h incubation with extracts of HS-BC and PJ-BC obtained from *K. xylinus* ATCC 53524, respectively; (E) 24 h after seeding, prior to disc placement; (F) After incubation for 24 h without disc (sham); (G),(H) After 24 h incubation beneath discs of HS-BC and PJ-BC obtained from *K. xylinus* ATCC 53524, respectively. Images taken with discs in place - prior to removal. Scale bar indicates 200 μm.

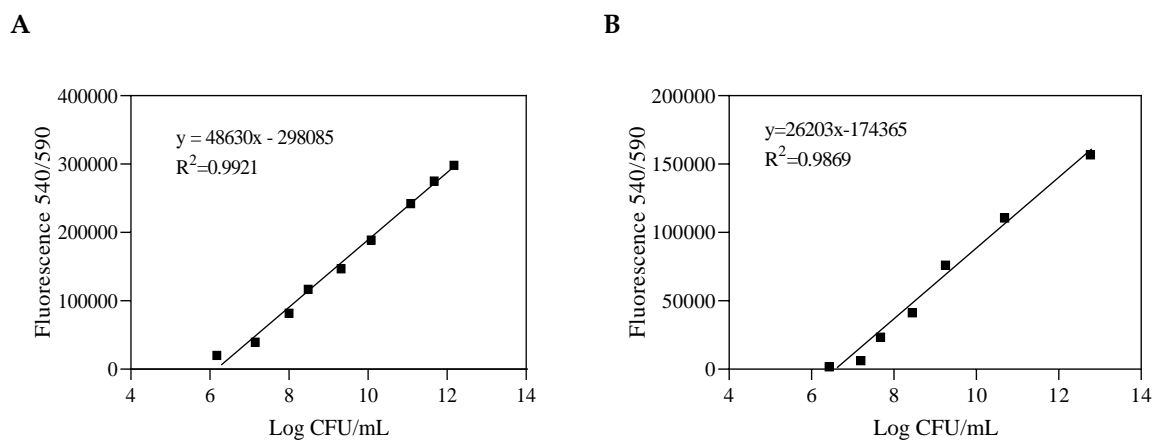

**Figure S5.** Standard curve of alamarBlue fluorescence intensity versus logarithm of *K. xylinus* ATCC 53524 cell concentration in the culture medium (A) and in the BC membranes (B).
